# Supplementary material
Source: publisher figshare collection journal article supplement (https://tandf.figshare.com/articles/dataset/_/12123111)
Supplement: Supplementary file 1 [file 1]

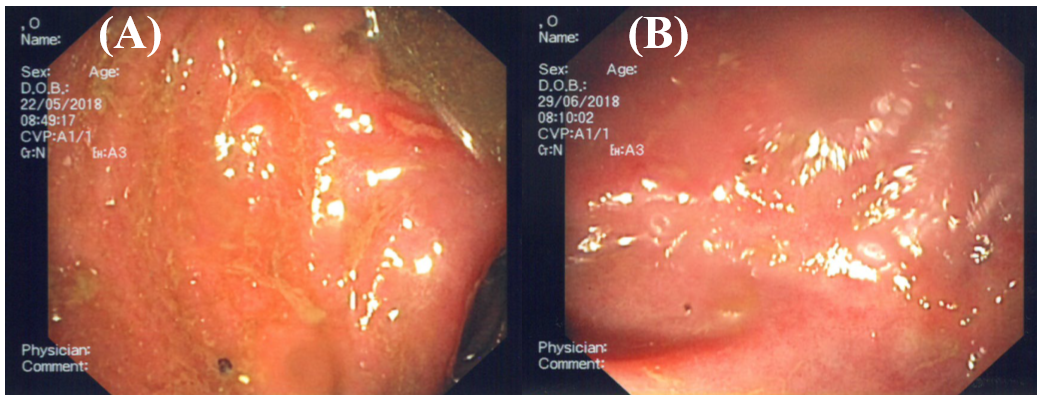


**Figure S1** Endoscopic assessment of the endoscopic pouchitis disease activity index (PDAI) score for patient ID 006. (**A**) before faecal microbiota transplantation (FMT) at inclusion, endoscopic PDAI score 4. (**B**) at the 30-day follow-up after FMT, endoscopic PDAI score 2.
